# Supplementary material for: Structural Study on Hypochlorous Acid-Mediated Chlorination of Betanin and Its Decarboxylated Derivatives from an Anti-Inflammatory Beta vulgaris L. Extract
Source: PubMed Central journal article supplement (PMC7024289; doi:10.3390/molecules25020378), 2020-01-16
Supplement: molecules-25-00378-s001.pdf [file molecules-25-00378-s001.pdf]

## Supplementary Materials

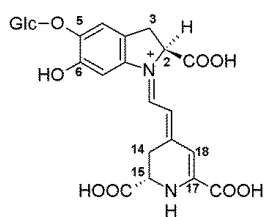

betanin 1; *m/z* 551

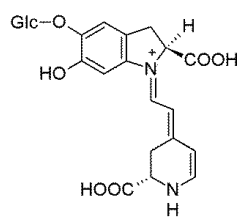

17-decarboxy-betanin 2;  
*m/z* 507

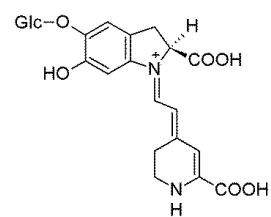

15-decarboxy-betanin 3;  
*m/z* 507

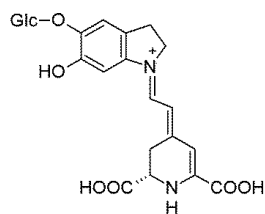

2-decarboxy-betanin 4;  
*m/z* 507

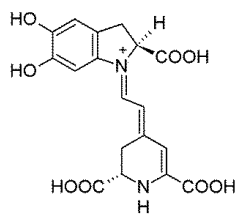

betanidin 5; *m/z* 389

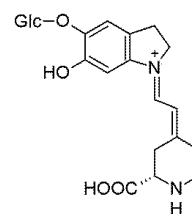

2,17-bidecarboxy-betanin 6;  
*m/z* 463

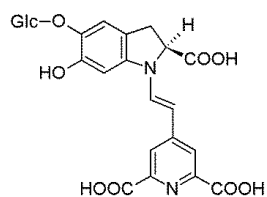

neobetainin 7; *m/z* 549

**Figure 1.** Chemical structures of betanin 1, its derivatives (2-4, 6-8) and betanidin 5 present in the BRE extract subjected to studies on chlorination.

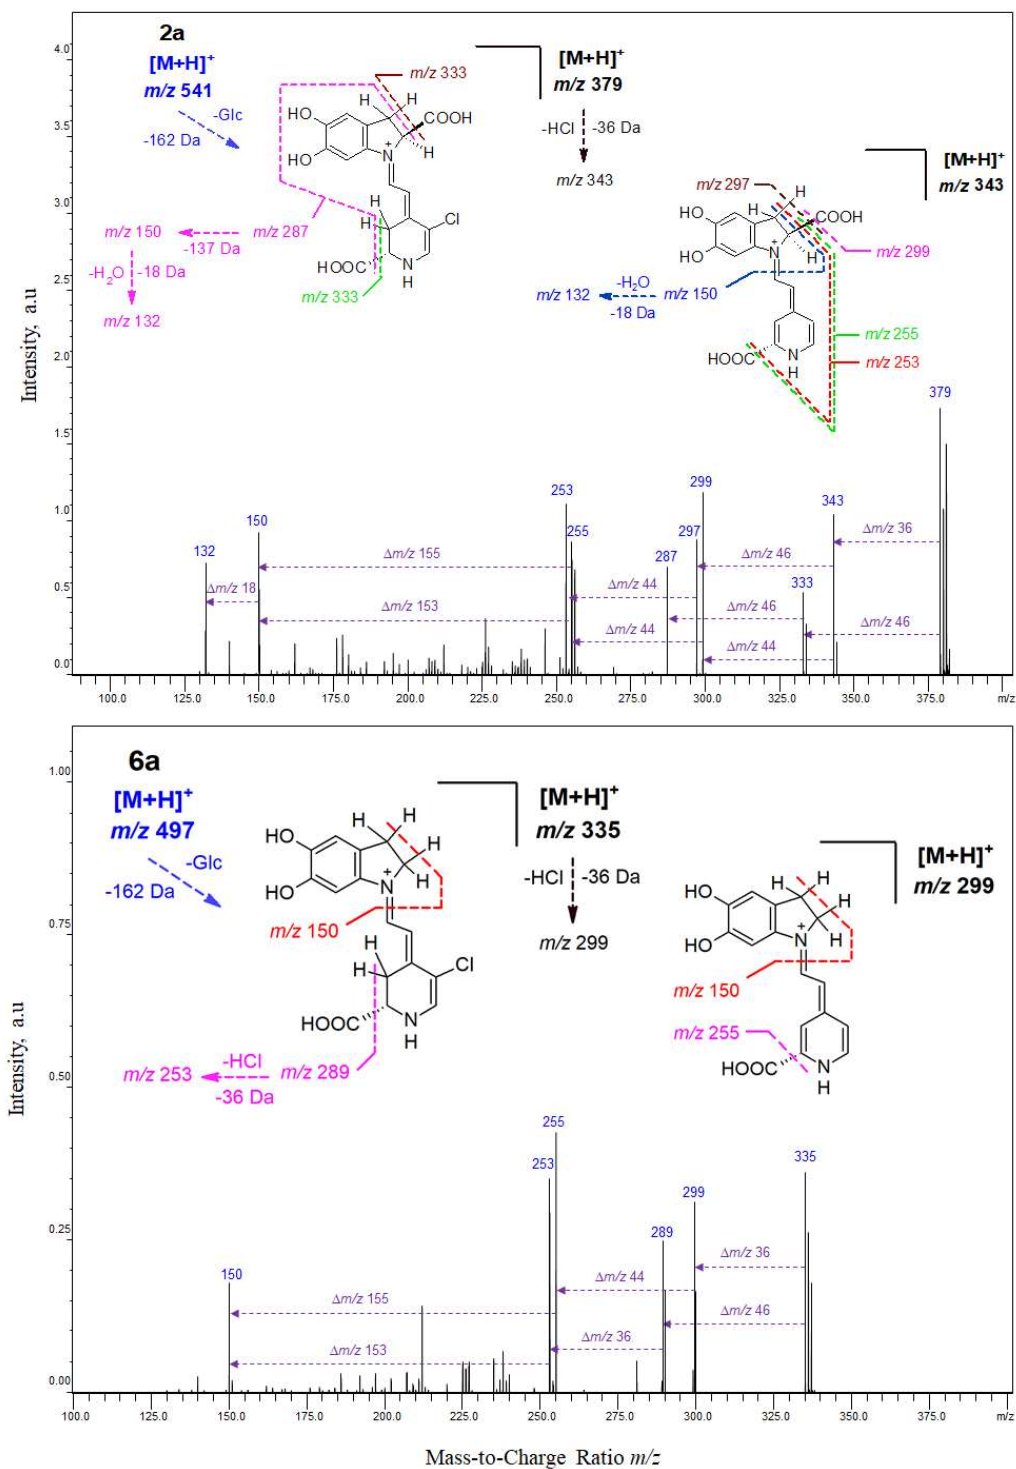

**Figure 2.** The HRMS fragmentation spectra obtained by IT-TOF for chlorinated decarboxylated derivatives 18-chloro-17-decarboxy-betainin **2a** and 18-chloro-2,17-bidecarboxy-betainin **6a** as well as the fragmentation pathways for their deglycosylated protonated ions.

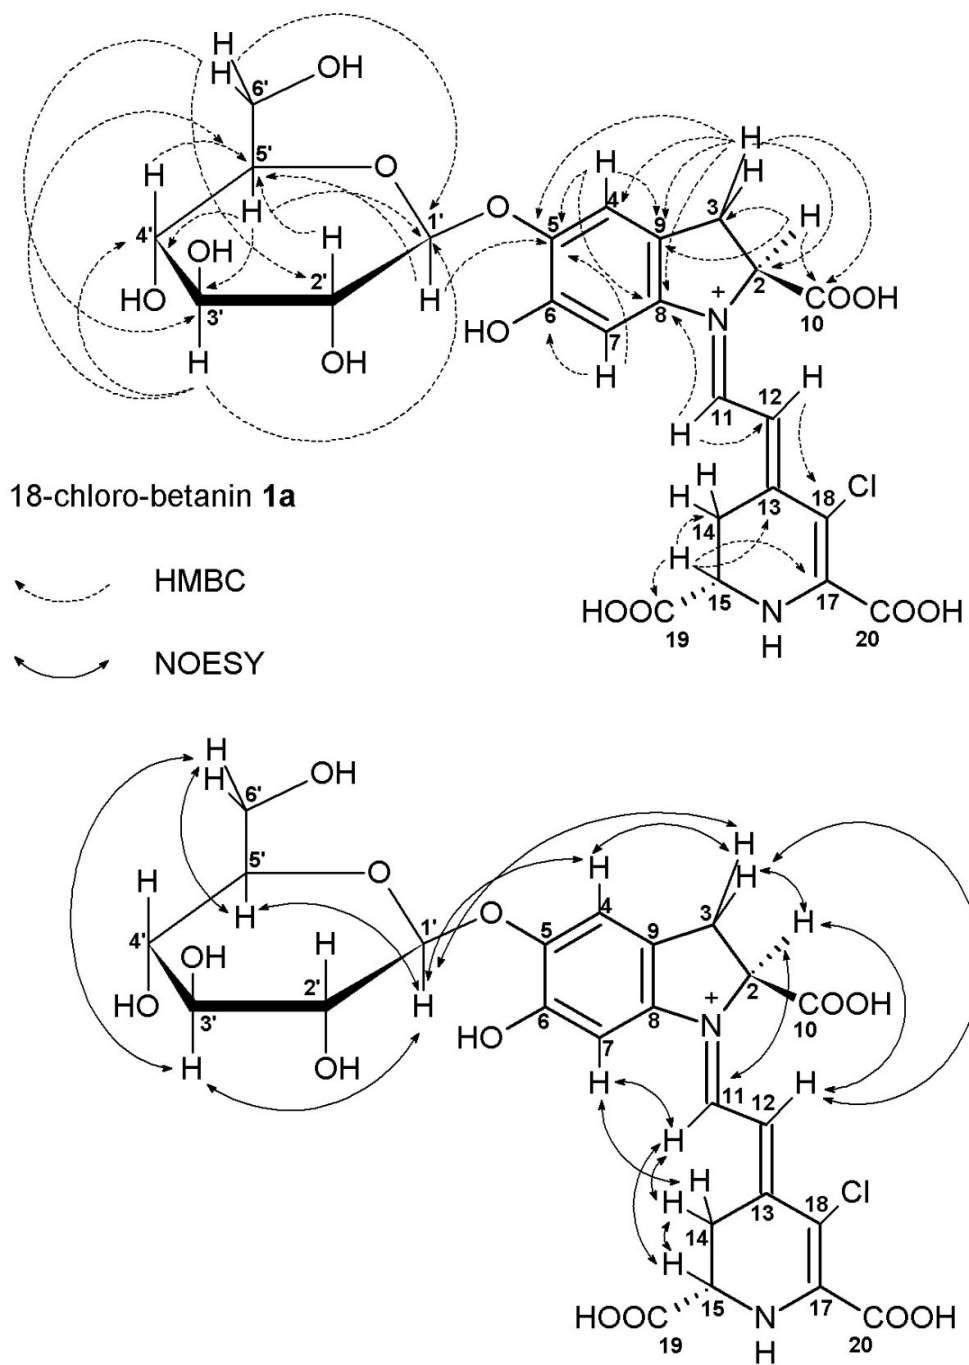

**Figure 3.** Important HMBC and NOESY NMR correlations in the structurally elucidated 18-chloro-betainin **1a**.
